# Supplementary material for: Role of free DNA ends and protospacer adjacent motifs for CRISPR DNA uptake in Pyrococcus furiosus
Source: PubMed Central journal article supplement — Nucleic Acids Res. 2017 Sep 25;45(19):11281–94. doi: 10.1093/nar/gkx839 (PMC5737086; doi:10.1093/nar/gkx839), 2017-09-25
Supplement: gkx839_supp.pdf [file gkx839_supp.pdf]

## **Supplementary Material for**

### **Role of free DNA ends and protospacer adjacent motifs for CRISPR DNA uptake in *Pyrococcus furious***

Masami Shiimori, Sandra C. Garrett, Dwain P. Chambers, Claiborne V. C. Glover III,  
Brenton R. Graveley, Michael P. Terns

## Supplementary Figure S1.

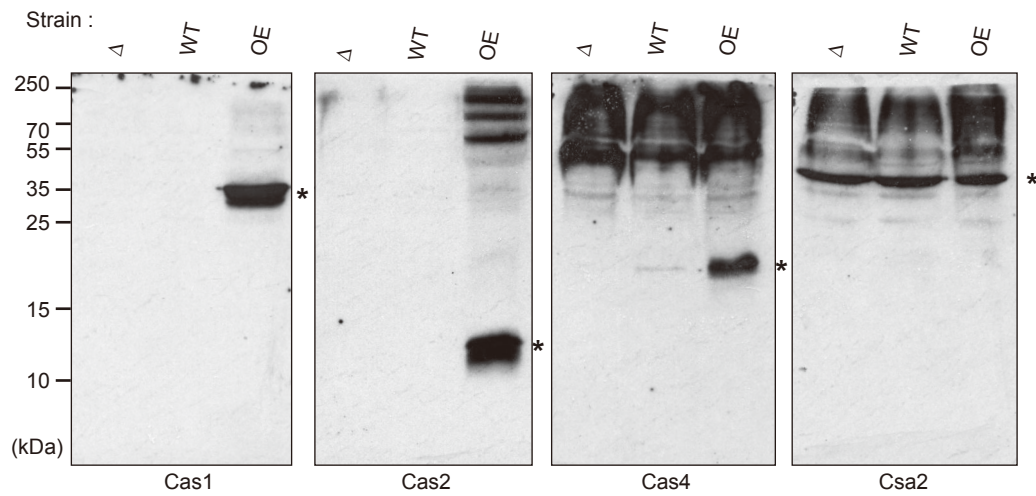

**Figure S1. Cas1, Cas2 and Cas4 protein expression.**

Western blot of *P. furiosus*  $\Delta$ , WT and OE strains with Cas1, Cas2, Cas4 and Csa2 antibodies. Csa2 is used as a loading control. The indicated antibodies detect a major band (indicated with asterisk) of the expected molecular weight for each antigen. The predicted molecular weight of each protein is: Cas1 (37.5 kDa), Cas2 (10.0 kDa), Cas4 (20.2 kDa), and Csa2 (37.4 kDa).

## Supplementary Figure S2

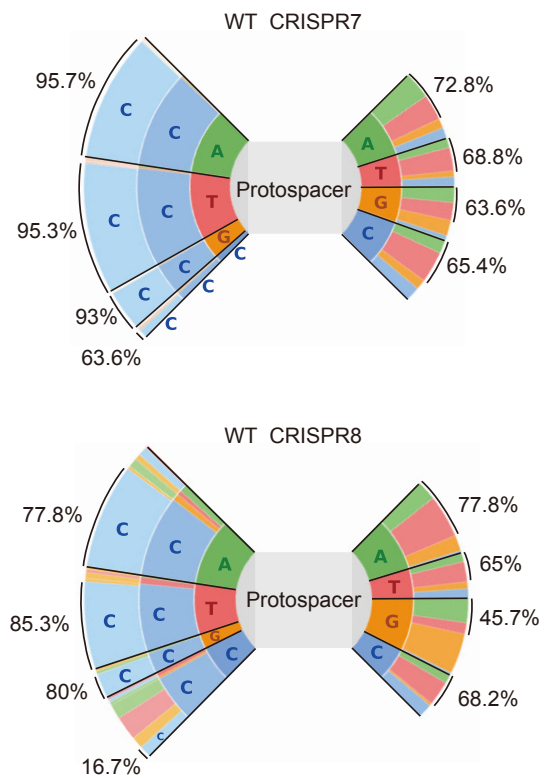

**Figure S2. Analysis of PAM for the CRISPR8 locus.** Newly-acquired spacers in the CRISPR7 and CRISPR8 array were used to search the genome and plasmids in order to identify the corresponding protospacers, and upstream and downstream sequences were extracted and used to generate consensus motifs on both strands of DNA. The plot shows the frequencies of three base pairs of flanking sequences upstream of the protospacer and two base pairs downstream of the protospacer for CRISPR7 and CRISPR8 in the WT strain. Percentages on left side indicate proportion of spacers with CC at the second and third position and percentages on right side indicate proportion of spacers with W (A/T) at the second position.

### Supplementary Figure S3

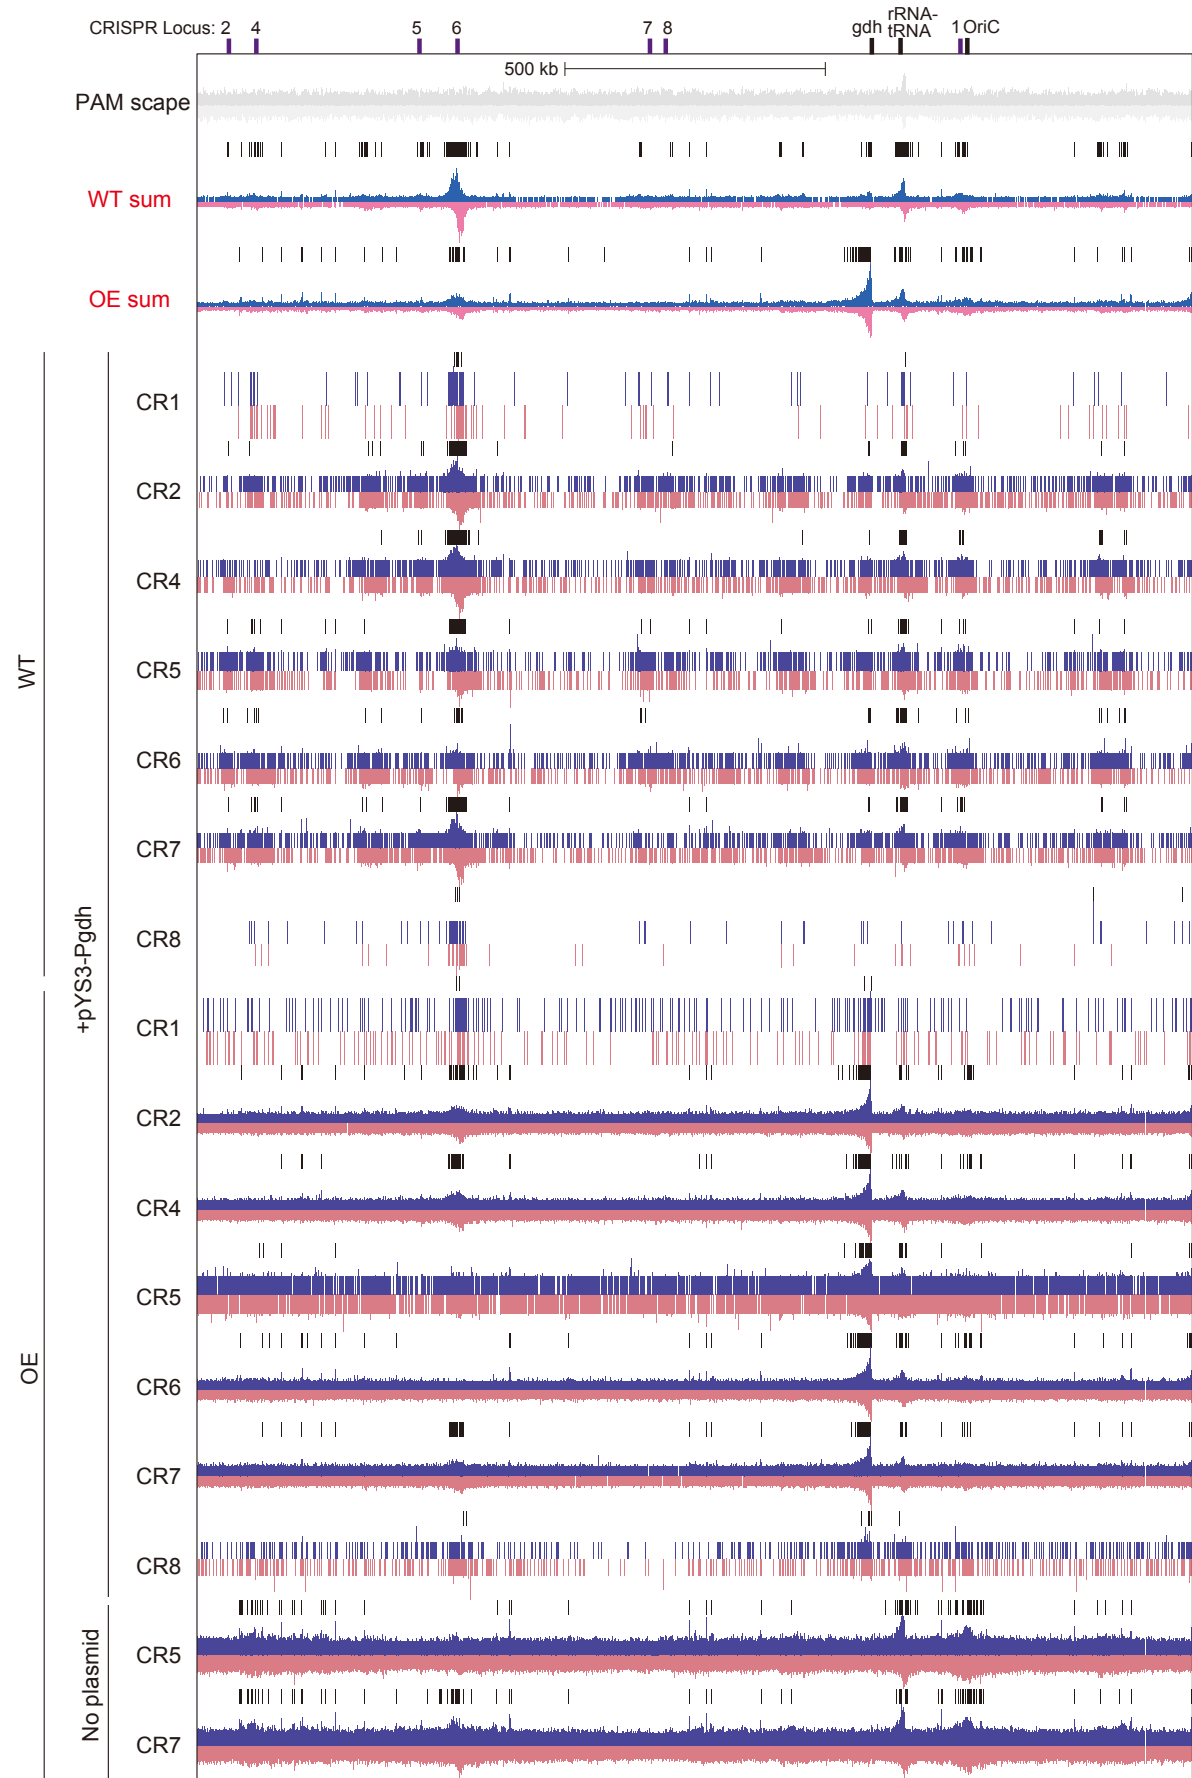

**Figure S3. Distribution patterns of aligned protospacers are similar for the seven CRISPR loci.**

New spacers were analyzed for all seven CRISPR loci, in both WT and OE strains. Protospacers were deduced by aligning these new spacers to the genome. Protospacers on the plus and minus strand are indicated in blue and pink respectively. The 5'-CCN-3'/5'-NGG-3' PAMscape across the chromosome is shown in gray (top). Black bars show regions where protospacers are significantly enriched over the background, as detected by the peak-calling software from the HOMER package. At the top, the "sum" tracks for WT and OE show the combined pool of spacers from all seven CRISPR loci. All identical spacers (with their identical alignment coordinates) are collapsed to a single representative.

## Supplementary Figure S4

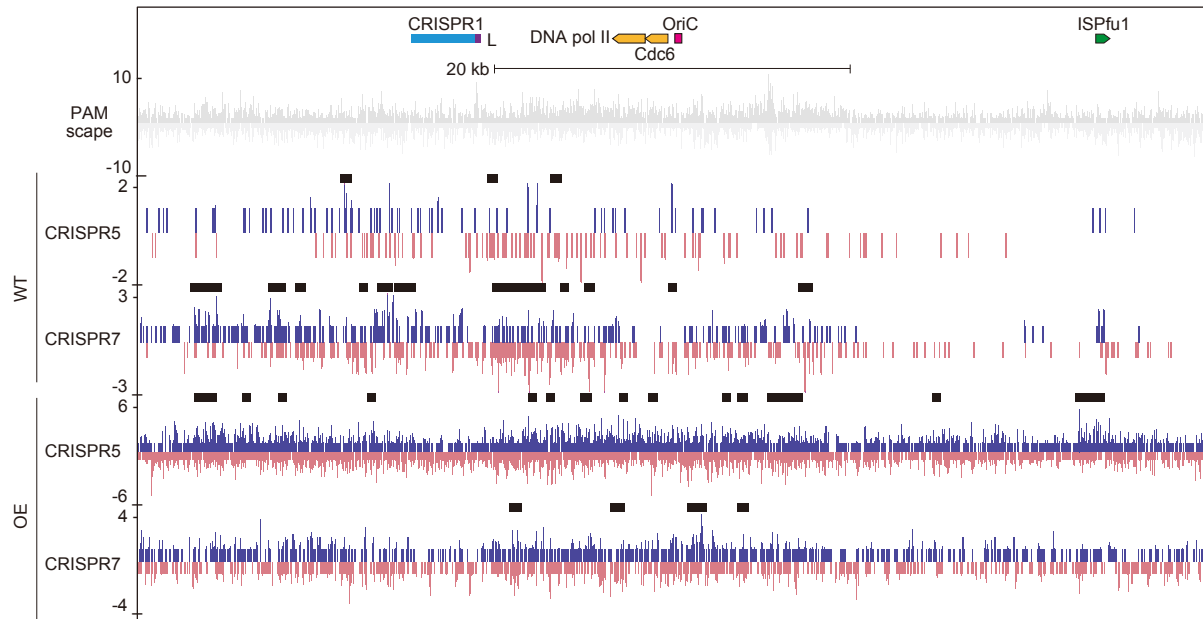

**Figure S4. Protospacers are enriched around the DNA replication origin.**

Protospacers are significantly enriched around the OriC DNA replication origin. Protospacers on the plus and minus strand are indicated in blue and pink, respectively. Protospacers were deduced from aligning new spacers acquired into the CRISPR5 and 7 loci of WT and OE strains. New spacers acquired into other CRISPR arrays showed similar trends. Black bars show areas where protospacers are significantly enriched, as detected by peak finding software in the HOMER package.

## Supplementary Figure S5

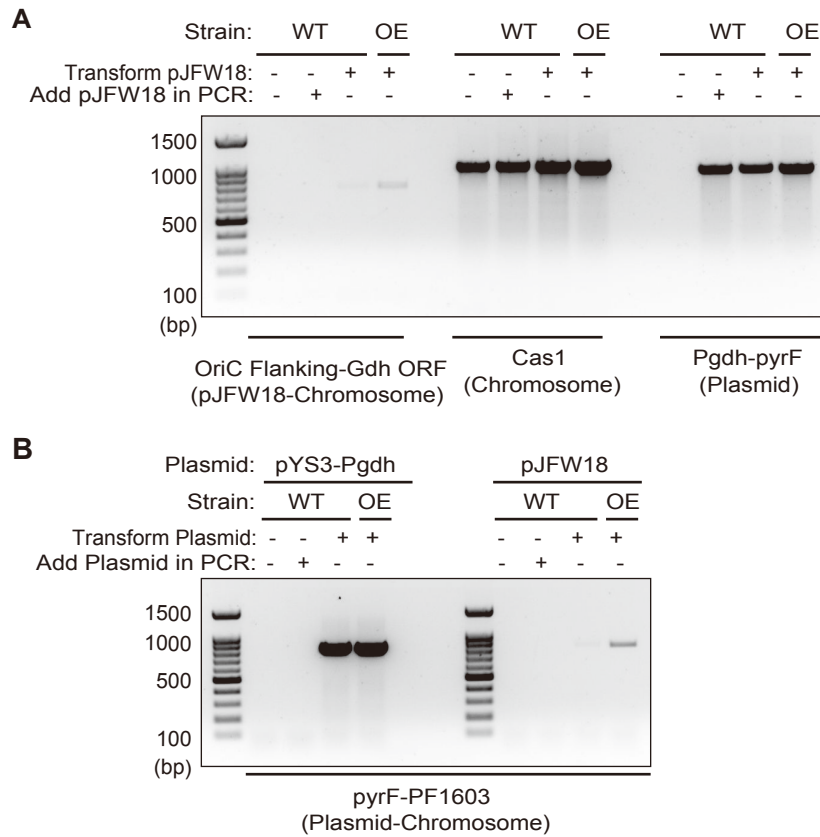

**Figure S5. Recombination between the plasmid and the chromosome.**

(A and B) PCR results confirm that homologous recombination between the plasmid and chromosome occurs. (A) Homologous recombination between pJFW18 plasmid and chromosome. This homologous recombination occurs preferentially when Cas proteins are overexpressed. (B) Homologous recombination between plasmids and chromosome. This homologous recombination occurs preferentially with rolling circle type replication plasmids.

Supplementary Figure S6

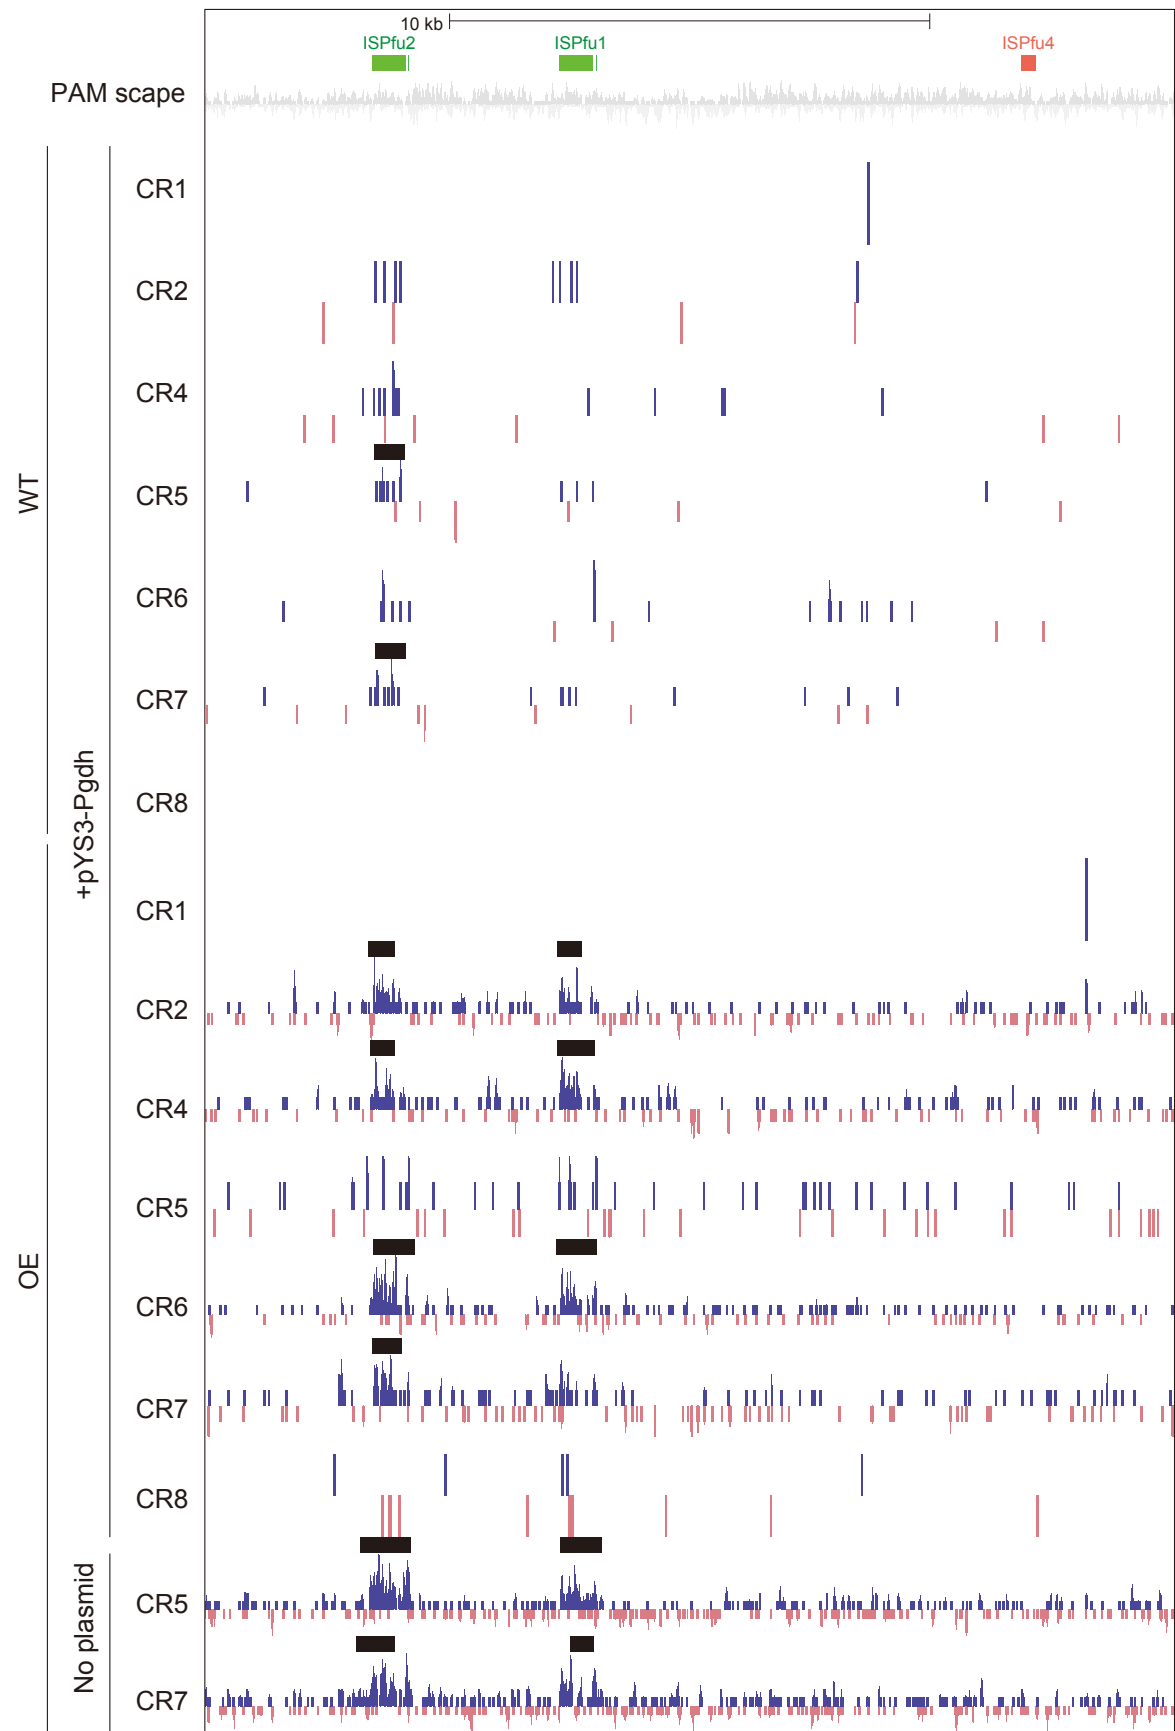



**Figure S6. Protospacers are enriched for transposons.** Protospacers are significantly enriched around active transposons but not around predicted inactive transposons. Black bars show areas where protospacers are significantly enriched, as detected by peak finding software in the HOMER package. Transposon peaks were observed for CR2, CR4, CR5, CR6, and CR7 loci, but were less apparent in the low efficiency loci CR1 and CR8. These peaks were not dependent on the presence of exogenous (plasmid) DNA.

## Supplementary Figure S7

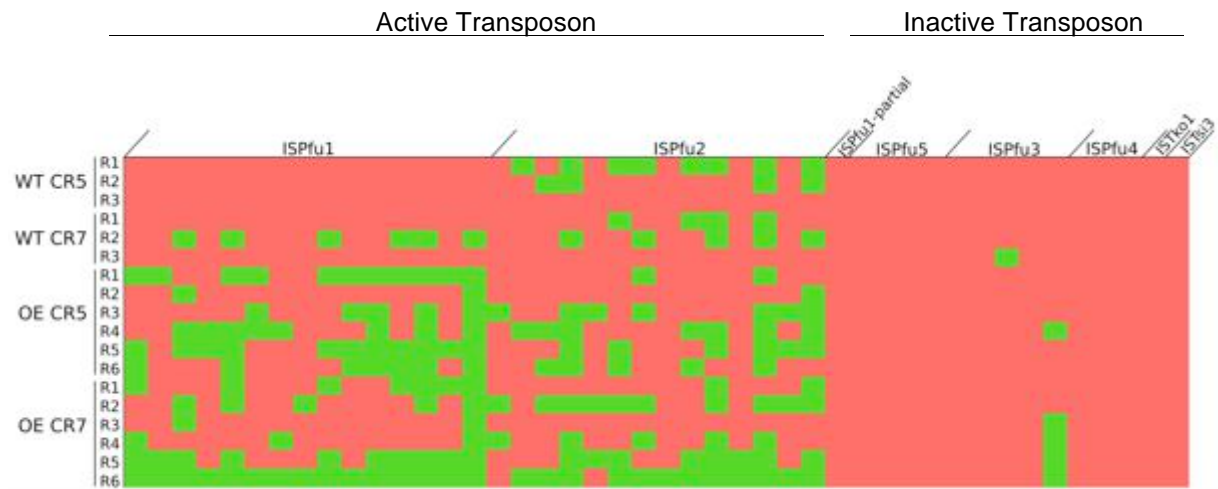

**Figure S7. Protospacers hotspots at transposons.**

Protospacers are significantly enriched at active transposons. Green spots show transposons for which protospacers are significantly enriched, as detected by peak finding software in the HOMER package. Red spots show transposons for which protospacers are not enriched. Protospacers were deduced by aligning new spacers acquired into the CRISPR5 and 7 loci of WT and OE strains.

## Supplementary Figure S8

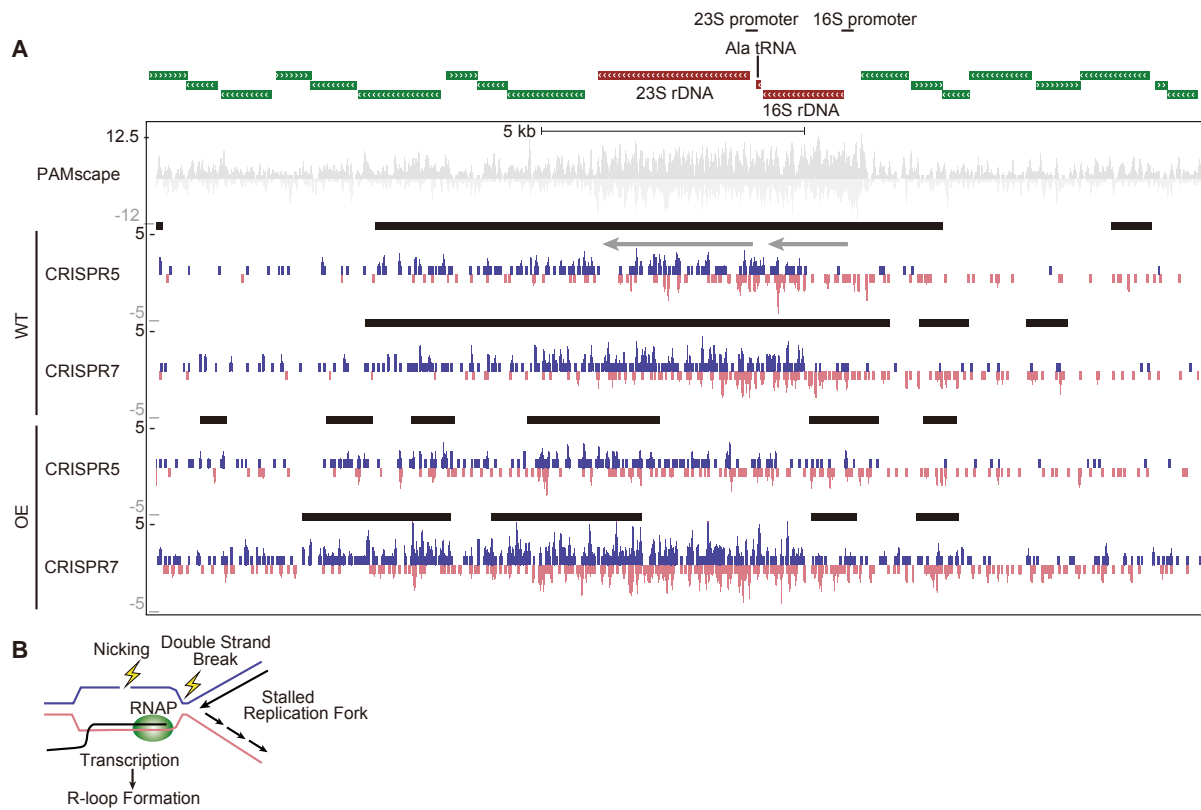

**Figure S8. Protospacers are enriched around rDNA gene cluster.**

(A) Protospacers are significantly enriched around the rRNA gene cluster. Protospacers on the plus and minus strand are indicated in blue and pink respectively. Protospacers were deduced from aligning new spacers acquired into the CRISPR5 and 7 loci of WT and OE strains. New spacers acquired into other CRISPR arrays showed similar trends. Black bars show areas where protospacers are significantly enriched, as detected by peak finding software in the HOMER package. (B) Cartoon model for formation of DNA nicks in the rRNA gene cluster.

## Supplemental Table S1. Oligonucleotide used in this study

### PCR oligonucleotide

| Name        | Sequence (5'-3')                      |
|-------------|---------------------------------------|
| CRISPR1 fow | CCGCTCGAGGGATGCCCCGTAAGGTTAT          |
| CRISPR1 rev | CCATCGATGATCAGATTGCTTAAGACAAGAAATGAAT |
| CRISPR2 fow | CCGCTCGAGCTTGGGTAAGGTTGATGTCC         |
| CRISPR2 rev | CCATCGATGTCAGAAGAAGAAGTGCGATGAAC      |
| CRISPR4 fow | CCGCTCGAGAAGGTGGATGTCCCGTAAGG         |
| CRISPR4 rev | CCATCGATCCCTTTGCATTGAGCAACATTC        |
| CRISPR5 fow | CCGCTCGAGTAAGTTGGATGCCCCGTAAG         |
| CRISPR5 rev | CCATCGATGCATGTCCAGAAACGAAGTCCTG       |
| CRISPR6 fow | CCGCTCGAGGGTAAGTTGGATGCCCCGTAAG       |
| CRISPR6 rev | CCATCGATGTTCCACTAAGGACATTTGTACGTCA    |
| CRISPR7 fow | CCGCTCGAGTTCTGGGGTAAGGTTGATGC         |
| CRISPR7 rev | CCATCGATCCGCAAGGACCGCATACTAC          |
| CRISPR8 fow | CCGCTCGAGAGGGTTTGGTAAGGGGTATTTGTAA    |
| CRISPR8 rev | CCATCGATGAGCAGCTATTTGCTTCGGC          |

### PCR oligonucleotide for Illumina Miseq

| Name              | Sequence (5'-3')                                                     |
|-------------------|----------------------------------------------------------------------|
| CRISPR1 fow HTS   | ACACTCTTTCCCTACACGACGCTCTTCCGATCTGAGTGATATAGTT<br>ACTCCGTAGGAGTATTGG |
| CRISPR1 rev HTS   | GTGACTGGAGTTCAGACGTGTGCTCTTCCGATCTGATCAGATTGC<br>TTAAGACAAGAAATGAAT  |
| CRISPR2 fow HTS   | ACACTCTTTCCCTACACGACGCTCTTCCGATCTCGAGTGATATAG<br>TACTCTGTAGGAGTATTGG |
| CRISPR2 rev HTS   | GTGACTGGAGTTCAGACGTGTGCTCTTCCGATCTGTCAGAAGAAG<br>AAGTGCGATGAAC       |
| CRISPR4 fow HTS   | ACACTCTTTCCCTACACGACGCTCTTCCGATCTGTAATTACCCCAA<br>TGGGGAATTGG        |
| CRISPR4 rev HTS   | GTGACTGGAGTTCAGACGTGTGCTCTTCCGATCTCCCTTTGCATT<br>GAGCAACATTC         |
| CRISPR5_6 fow HTS | ACACTCTTTCCCTACACGACGCTCTTCCGATCTCAAGTGATATAAT                       |

|                 |                                                                      |
|-----------------|----------------------------------------------------------------------|
|                 | TACTCCATAGGAGTATTGG                                                  |
| CRISPR5 rev HTS | GTGACTGGAGTTCAGACGTGTGCTCTTCCGATCTTCCAGAAACGA<br>AGTCCTGGC           |
| CRISPR6 rev HTS | GTGACTGGAGTTCAGACGTGTGCTCTTCCGATCTGGACATTTGTA<br>CGTCAAATTCTTCAC     |
| CRISPR7 fow HTS | ACACTCTTCCCTACACGACGCTCTTCCGATCTGATGTAGTTACTC<br>CGTAGGAGGATTGG      |
| CRISPR7 rev HTS | GTGACTGGAGTTCAGACGTGTGCTCTTCCGATCTCCGCAAGGAC<br>CGCATACTAC           |
| CRISPR8 fow HTS | ACACTCTTCCCTACACGACGCTCTTCCGATCTCAAGTGATATAAT<br>TACTCCATAGGAGTATTGG |
| CRISPR8 rev HTS | GTGACTGGAGTTCAGACGTGTGCTCTTCCGATCTGAGCAGCTATT<br>TGCTTCGGC           |

### Oligonucleotide for generating overexpression and deletion strain

| Name             | Sequence (5'-3')                                              |
|------------------|---------------------------------------------------------------|
| Cas O/E_Cas2_fow | ACCCAAGGAGGTGTTGTCATATGTACATTGTAGTTGTCTACG                    |
| Cas O/E_Cas2_rev | AAAAAAAAATCATTAATTATTTCTCTATTGGATTCTTTTC                      |
| Cas O/E_Cas4_fow | ATGGAAGAGTACGCCTTAGAG                                         |
| Cas O/E_Cas4_rev | AAAAAAAAATCACTACCCCAACAAAGT                                   |
| Cas O/E_Cas1_fow | ATGAGAAAAAAGTCTTTAACAATTTTTTTCTG                              |
| Cas O/E_Cas1_rev | GGAGAAGAGAGGGGGGATCCTCAAACCACGCGACAAGGG                       |
| Cas O/E_Pslp_fow | ATAGAGGAAATAATTTAATGATTTTTTTTTCTGGCAGAATAGAAATA<br>GATATTATC  |
| Cas O/E_Pslp_rev | CTCTAAGGCGTACTCTTCCATTTTTCTCCACCTCCCAATAA                     |
| Cas O/E_Ppsp_fow | ACTTTGTTGGGGGTAGTGATTTTTTTTTGTCAAATGCTCATCATTTA<br>GTT        |
| Cas O/E_Ppsp_rev | CAGAAAAAATTGTTAAAGACTTTTTTCTCATATCGATTCACCTCCG<br>CCTTA       |
| P-gdh-PyrF_fow   | GATTGAAAATGGAGTGAGCTGAG                                       |
| P-gdh-PyrF_rev   | TTATCTTGAGCTCCATTCTTTTACC                                     |
| PF1120_CR7_1     | CCAGTGCCAAGCTTGCATGCACCGGTACGCGTTTAAACACTCAA<br>GAGAGCGGAGCAA |
| PF1120_CR7_2     | CTCAGCTCACTCCATTTTCAATCTAGAGAATATCCCCCTCACGG                  |

|              |                                                                           |
|--------------|---------------------------------------------------------------------------|
| PF1120_CR7_5 | GGTGAAAGAATGGAGCTCAAGATAATGAAGCAATTCCAGGAGCTT                             |
| PF1120_CR7_6 | GCATTACTAGTTTCGTTGACGTCTAGAGAATATCCCCCTCACGG                              |
| PF1120_CR7_7 | GACGTCAACGAAACTAGTAATGCGGCCGCAGATATCGTGAAACAC<br>CCAAAAATTTTTCGA          |
| PF1120_CR7_8 | TATGACATGATTACGAATTCTACGTATCCGGATTAATTAATTTAAAT<br>TTATTGGAAGCTTGCACTCACG |

### Oligonucleotide for generating plasmids

| Name     | Sequence (5'-3')                              |
|----------|-----------------------------------------------|
| Pslp_fow | CGGGATCCACTCTTTTCGGAAATAGCAAGTATAGTC          |
| Pslp_rev | CGTCCAACGCTAGTACAATCATTTTTCTCCACCTCCAATAATCTG |
| PyrF_fow | ATGATTGTACTAGCGTTGGACG                        |
| PyrF_rev | AAGATATCGTCGATTGGCTGAGCTCATG                  |

**Supplementary Table S2. Plasmids used in this study**

| <b>Name</b> | <b>Relevant Characteristic</b>                                                                                                        | <b>Source or reference</b> |
|-------------|---------------------------------------------------------------------------------------------------------------------------------------|----------------------------|
| pYS3        | AmpR general cloning vector with <i>E. coli</i> pUC19 ori and SimR for selection and Rep75 gene for replication in <i>P. furiosus</i> | (1)                        |
| pYS3-Pgdh   | pYS3-derivative, Pgdh-pyrF replaced with SimR                                                                                         | (2)                        |
| pJFW17      | AprR general cloning vector with <i>E. coli</i> OriT, and <i>Pfu</i> Pgdh-pyrF cassette                                               | (3)                        |
| pJFW18      | pJFW17-derivative, <i>P. furiosus</i> OriC for replication in <i>P. furiosus</i>                                                      | (3)                        |
| pYS3-Pslp   | pYS3-derivative, Pslp-pyrF replaced with SimR                                                                                         | This study                 |
| pHSG298     | The kanamycin resistant pUC vectors                                                                                                   | Takara                     |
| pJE47       | pJFW18 derivative, Tk-csg promoter-chiA terminator expression cassette                                                                | (4)                        |
| pMS32       | pHSG298-derivative, containing Cas1, Cas2, Cas4 overexpression cassette                                                               | This study                 |

**Supplementary Table S3. Strains used in this study**

| <b>Name</b> | <b>Relevant Characteristic</b>                  | <b>Source or reference</b> |
|-------------|-------------------------------------------------|----------------------------|
| JFW02 (5)   | <i>ΔpyrF ΔtrpAB</i>                             | (6)                        |
| TPF43       | JFW02 with Cas1, Cas2, Cas4 overexpression      | This study                 |
| TPF55       | JFW02 $\Delta$ Cas1 $\Delta$ Cas2 $\Delta$ Cas4 | This study                 |



## **Materials and Methods**

### **Western blot**

*P. furiosus* strains (WT, OE,  $\Delta$ ) were grown overnight. Cells in 1 ml liquid culture were pelleted and lysed with 20  $\mu$ l SDS loading buffer. Cells were incubated at for 98 °C 10 min and then on ice for 2 min. Whole lysate was separated on a 15% SDS-PAGE gel and blotted onto a nitrocellulose membrane (Bio-Rad). The blots were incubated with 1:12,500 - 1:25,000 dilution of polyclonal IgY antibodies and 1:25,000 dilution of HRP-conjugated anti-IgY secondary antibody (Gallus Immunotech). The protein bands on the blot were detected using an enhanced chemiluminescent substrate for HRP (horse radish peroxidase) activity (ECL Prime, GE helthcare).

## Reference

1. Waege, I., Schmid, G., Thumann, S., Thomm, M. and Hausner, W. (2010) Shuttle vector-based transformation system for *Pyrococcus furiosus*. *Appl Environ Microbiol*, **76**, 3308-3313.
2. Swarts, D.C., Hegge, J.W., Hinojo, I., Shiimori, M., Ellis, M.A., Dumrongkulraksa, J., Terns, R.M., Terns, M.P. and van der Oost, J. (2015) Argonaute of the archaeon *Pyrococcus furiosus* is a DNA-guided nuclease that targets cognate DNA. *Nucleic acids research*, **43**, 5120-5129.
3. Farkas, J., Chung, D., DeBarry, M., Adams, M.W. and Westpheling, J. (2011) Defining components of the chromosomal origin of replication of the hyperthermophilic archaeon *Pyrococcus furiosus* needed for construction of a stable replicating shuttle vector. *Appl Environ Microbiol*, **77**, 6343-6349.
4. Elmore, J., Deighan, T., Westpheling, J., Terns, R.M. and Terns, M.P. (2015) DNA targeting by the type I-G and type I-A CRISPR-Cas systems of *Pyrococcus furiosus*. *Nucleic acids research*, **43**, 10353-10363.
5. Antal, C.E., Hudson, A.M., Kang, E., Zanca, C., Wirth, C., Stephenson, N.L., Trotter, E.W., Gallegos, L.L., Miller, C.J., Furnari, F.B. *et al.* (2015) Cancer-associated protein kinase C mutations reveal kinase's role as tumor suppressor. *Cell*, **160**, 489-502.
6. Farkas, J., Stirrett, K., Lipscomb, G.L., Nixon, W., Scott, R.A., Adams, M.W. and Westpheling, J. (2012) Recombinogenic properties of *Pyrococcus furiosus* strain COM1 enable rapid selection of targeted mutants. *Appl Environ Microbiol*, **78**, 4669-4676.
